# Supplementary material
Source: PubMed Central journal article supplement (PMC6313252)
Supplement: NIHMS998884-supplement-Supplemental.pdf [file NIHMS998884-supplement-Supplemental.pdf]

# ONLINE SUPPLEMENT

Supplementary Table I. Baseline characteristics and dementia status by quartiles of cfPWV (3.7- 24.8 m/sec)\*

|                                     | CfPWV Quartiles    |                   |                   |                   | <i>p-trend</i> † |
|-------------------------------------|--------------------|-------------------|-------------------|-------------------|------------------|
|                                     | Q1 (n=89)          | Q2 (n=89)         | Q3 (n=89)         | Q4 (n=89)         |                  |
| cfPWV, m/sec median (IQR)           | 5.8 (5.3, 6.2)     | 7.4 (7.1, 7.9)    | 9.0 (8.5, 9.5)    | 11.4 (10.8, 13.0) | -                |
| Age, years                          | 77.3±3.5           | 77.3±3.8          | 77.7±3.5          | 78.7±4.1          | 0.02             |
| Men (n, %)                          | 38 (42.7)          | 28 (31.5)         | 38 (42.7)         | 42 (47.2)         | 0.29             |
| Black (n, %)                        | 18 (20.2)          | 23 (25.8)         | 21 (23.9)         | 16 (18.0)         | 0.66             |
| Education, years median (IQR)       | 20.0 (12.0, 21.0)  | 18.0 (12.0, 20.0) | 12.0 (12.0, 20.0) | 14.0 (12.0, 20.0) | <0.01            |
| Hypertension (n, %)                 | 52 (59.1)          | 54 (62.1)         | 61 (68.5)         | 66 (75.9)         | 0.01             |
| Anti-hypertensive medication (n, %) | 45 (50.6)          | 44 (49.4)         | 54 (60.7)         | 52 (58.4)         | 0.14             |
| SBP, mmHg                           | 123.6±18.7         | 129.2±20.7        | 130.5±16.7        | 135.6±20.3        | <0.01            |
| DBP, mmHg                           | 63.9±12.0          | 67.7±9.0          | 67.9±11.9         | 66.6±11.1         | 0.09             |
| Pulse pressure, mmHg                | 58.6±17.1          | 61.5±17.6         | 61.7±16.3         | 69.0±16.5         | <0.01            |
| Mean arterial pressure, mmHg        | 84.2±10.7          | 88.2±11.3         | 89.3±9.7          | 89.6±12.6         | <0.01            |
| Diabetes mellitus (n, %)            | 7 (8.0)            | 10 (11.5)         | 10 (11.4)         | 13 (15.3)         | 0.15             |
| BMI, kg/m <sup>2</sup>              | 26.4±4.0           | 26.8±4.4          | 27.2±4.3          | 27.5±4.6          | 0.08             |
| <i>APOE4</i> carriers (n, %)        | 26 (31.3)          | 19 (22.4)         | 18 (22.0)         | 16 (19.8)         | 0.10             |
| 3MSE median (IQR)                   | 98.0 (95.0, 100.0) | 97.0 (93.0, 96.0) | 97.0 (92.0, 99.0) | 96.0 (93.0, 98.0) | <0.01            |
| MCI at baseline (n, %)              | 15 (16.9)          | 15 (16.9)         | 11 (12.4)         | 24 (27.0)         | 0.16             |
| >1 infarct (n, %)                   | 15 (18.5)          | 21 (25.6)         | 16 (20.3)         | 26 (33.3)         | 0.07             |
| Ventricular grade $\geq$ 5 (n, %)   | 15 (18.5)          | 15 (18.3)         | 17 (21.8)         | 10 (12.8)         | 0.48             |
| White matter grade $\geq$ 3 (n, %)  | 22 (27.2)          | 30 (36.6)         | 28 (35.9)         | 28 (35.9)         | 0.28             |

Abbreviations: 3MSE, Modified Mini-Mental State Examination; BMI, body mass index; CAC, coronary artery calcium; cfPWV, carotid-femoral pulse wave velocity; CHS-CS, Cardiovascular Health Study Cognition Study; DBP, diastolic blood pressure; HDLc, high density lipoprotein cholesterol; IQR, interquartile range; LDLc, low density lipoprotein cholesterol; MCI, mild cognitive impairment; SBP, systolic BP. \* Results are mean±SD unless otherwise indicated. † Continuous variables: Spearman rank-order correlation; Categorical variables: Cochran-Armitage trend test.

Supplementary Table II. Dementia risk (HR and 95% CI) for blood pressure measures (quartiles and continuous)

| Predictor | Model            | BP Quartiles |                   |                   |                   | <i>p-trend</i> | per 10-unit higher BP |
|-----------|------------------|--------------|-------------------|-------------------|-------------------|----------------|-----------------------|
|           |                  | Q1           | Q2                | Q3                | Q4                |                |                       |
| SBP       | Range, mmHg      | 83.0-115.0   | 116.0-127.0       | 128.0-141.0       | 142.0-203.0       |                |                       |
|           | N dementia/total | 51/85        | 46/87             | 53/90             | 57/86             | -              |                       |
|           | Minimal*         | 1.00         | 0.89 (0.60, 1.33) | 0.95 (0.65, 1.40) | 1.14 (0.78, 1.66) | 0.48           | 1.06 (0.98, 1.13)     |
|           | Base†            | 1.00         | 0.91 (0.60, 1.41) | 1.04 (0.69, 1.57) | 1.12 (0.75, 1.67) | 0.48           | 1.07 (0.99, 1.15)     |
|           | Full ‡           | 1.00         | 0.92 (0.60, 1.42) | 1.05 (0.69, 1.58) | 1.13 (0.75, 1.69) | 0.46           | 1.07 (0.99, 1.15)     |
| DBP       | Range, mmHg      | 31.0-59.0    | 60.0-67.0         | 68.0-73.0         | 74.0-94.0         |                |                       |
|           | N dementia/total | 51/81        | 56/94             | 47/82             | 53/89             | -              |                       |
|           | Minimal          | 1.00         | 0.99 (0.68, 1.45) | 0.92 (0.62, 1.37) | 1.06 (0.72, 1.56) | 0.87           | 1.04 (0.91, 1.20)     |
|           | Base             | 1.00         | 1.05 (0.69, 1.58) | 0.95 (0.62, 1.45) | 1.19 (0.78, 1.83) | 0.54           | 1.09 (0.94, 1.27)     |
|           | Full             | 1.00         | 1.04 (0.69, 1.58) | 0.95 (0.62, 1.45) | 1.19 (0.77, 1.82) | 0.56           | 1.09 (0.94, 1.27)     |
| MAP       | Range, mmHg      | 50.7-79.7    | 80.0-87.7         | 87.7-94.7         | 95.0-121.0        |                |                       |
|           | N dementia/total | 52/86        | 47/87             | 50/86             | 58/87             | -              |                       |
|           | Minimal          | 1.00         | 0.89 (0.60, 1.32) | 0.90 (0.61, 1.34) | 1.26 (0.86, 1.83) | 0.25           | 1.08 (0.96, 1.22)     |
|           | Base             | 1.00         | 0.90 (0.59, 1.38) | 0.92 (0.61, 1.40) | 1.36 (0.90, 2.05) | 0.16           | 1.12 (0.98, 1.28)     |
|           | Full             | 1.00         | 0.91 (0.59, 1.40) | 0.93 (0.61, 1.41) | 1.37 (0.91, 2.06) | 0.15           | 1.12 (0.98, 1.28)     |
| PP        | Range, mmHg      | 18.0-50.0    | 51.0-60.0         | 61.0-72.0         | 73.0-128.0        |                |                       |
|           | N dementia/total | 48/86        | 45/86             | 55/87             | 59/87             | -              |                       |
|           | Minimal          | 1.00         | 0.99 (0.66, 1.50) | 1.17 (0.79, 1.72) | 1.28 (0.87, 1.89) | 0.13           | 1.07 (0.98, 1.16)     |
|           | Base             | 1.00         | 1.09 (0.70, 1.69) | 1.26 (0.82, 1.93) | 1.28 (0.84, 1.96) | 0.20           | 1.06 (0.98, 1.16)     |
|           | Full             | 1.00         | 1.10 (0.71, 1.71) | 1.28 (0.84, 1.97) | 1.30 (0.85, 1.98) | 0.16           | 1.06 (0.98, 1.16)     |

Abbreviations: CI, confidence interval; DBP, diastolic blood pressure; HR, hazards ratio; MAP, mean arterial pressure; PP, pulse pressure; SBP, systolic blood pressure. \* Minimal model: age (yr) + sex (male vs. female). † Base model: minimal model + education ( $\geq 12$  yrs vs.  $< 12$  yrs) + race (black vs. white) + *APOE4* (carrier vs. noncarrier) + diabetes (yes vs. no) + BMI ( $\text{kg}/\text{m}^2$ ) (not MAP) ‡ Full model: base model + anti-hypertensive medication (yes vs. no)

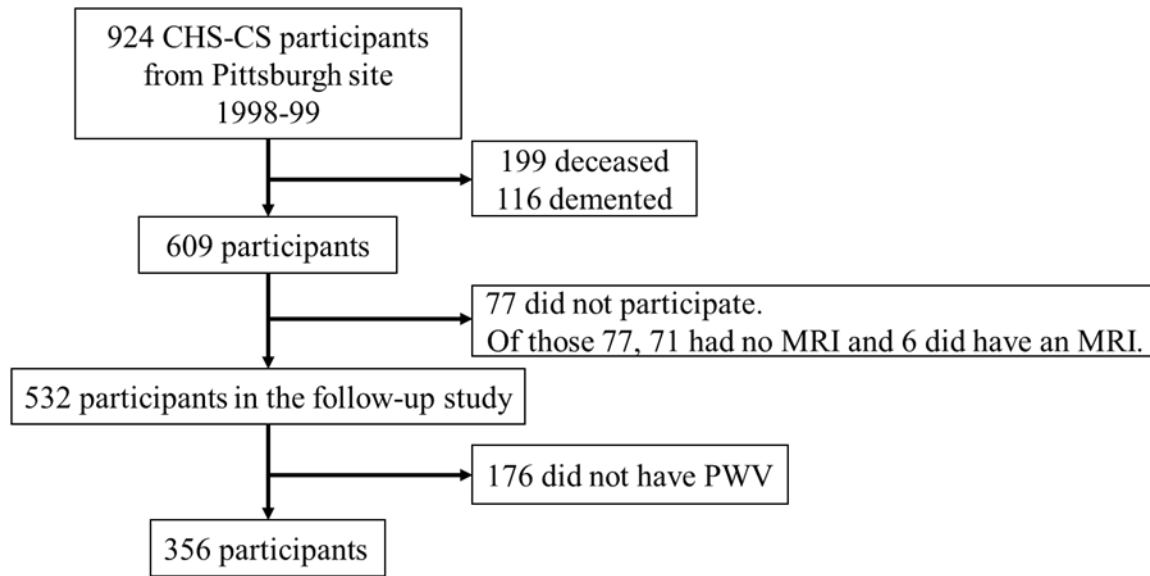

Supplementary Figure I. Participants in the current analysis
